# Supplementary material for: The Epidemiological Characteristics and Prognostic Factors of Low-Grade Brainstem Glioma: A Real-World Study of Pediatric and Adult Patients
Source: PubMed Central journal article supplement (PMC7160332; doi:10.3389/fonc.2020.00391), 2020-04-09
Supplement: Data_Sheet_1.pdf [file Data_Sheet_1.pdf]

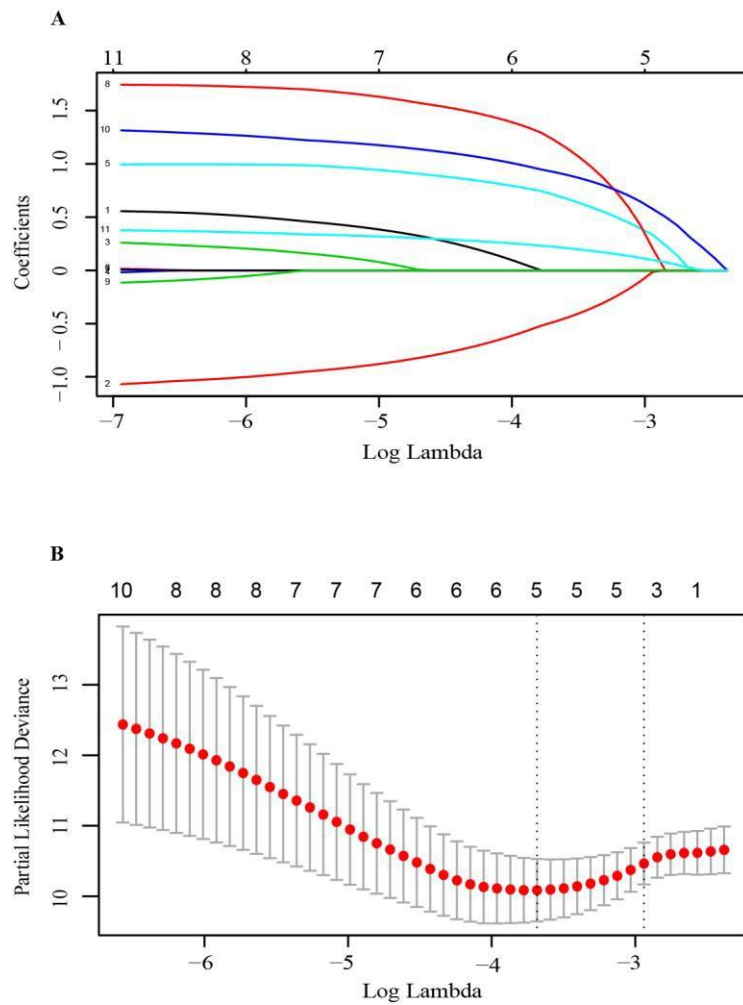

**Figure S1** L1-penalized (Lasso) regression model were applied to further identified prognostic factors in training cohort. Metastasis, age group, histology, adjuvant therapy and WHO grade were identified for OS. (A). LASSO coefficient profiles of the features. (B). Ten-time cross-validation for tuning parameter selection in the Lasso Model.

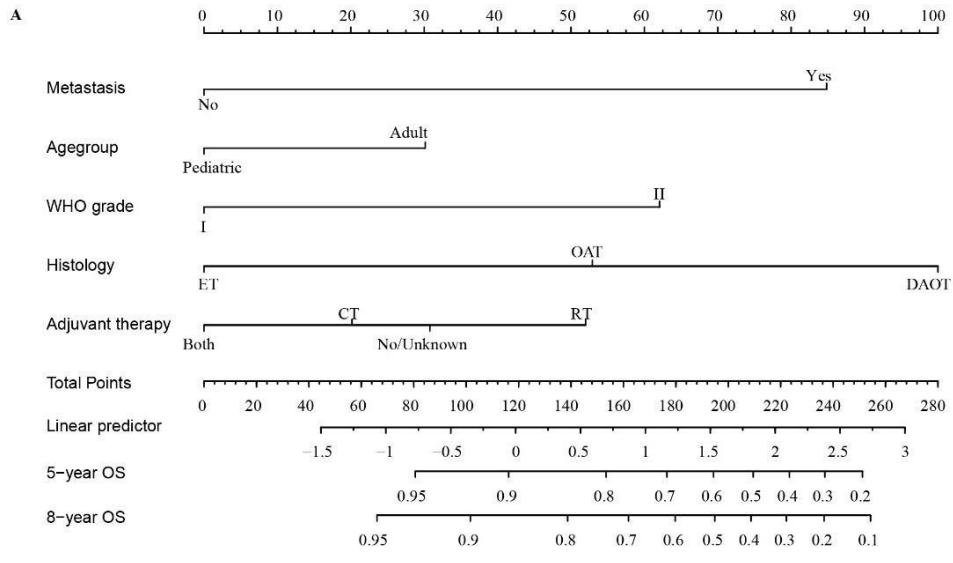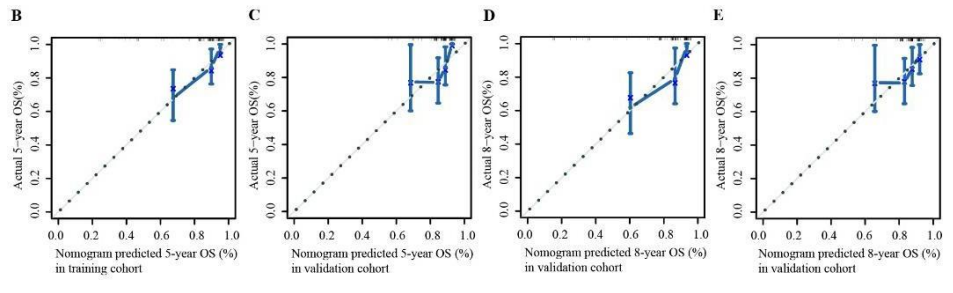

**Figure S2** Nomogram and internal calibration for overall survival rate. **(A)** Nomogram to predict 5-year and 8 year OS rates of low-grade brainstem glioma patients; The internal calibration curve to predict 5-year OS rate in training cohort **(B)** and validation cohort **(C)**; The internal calibration curve to predict 8-year OS rate in training cohort **(D)** and validation cohort **(E)**.

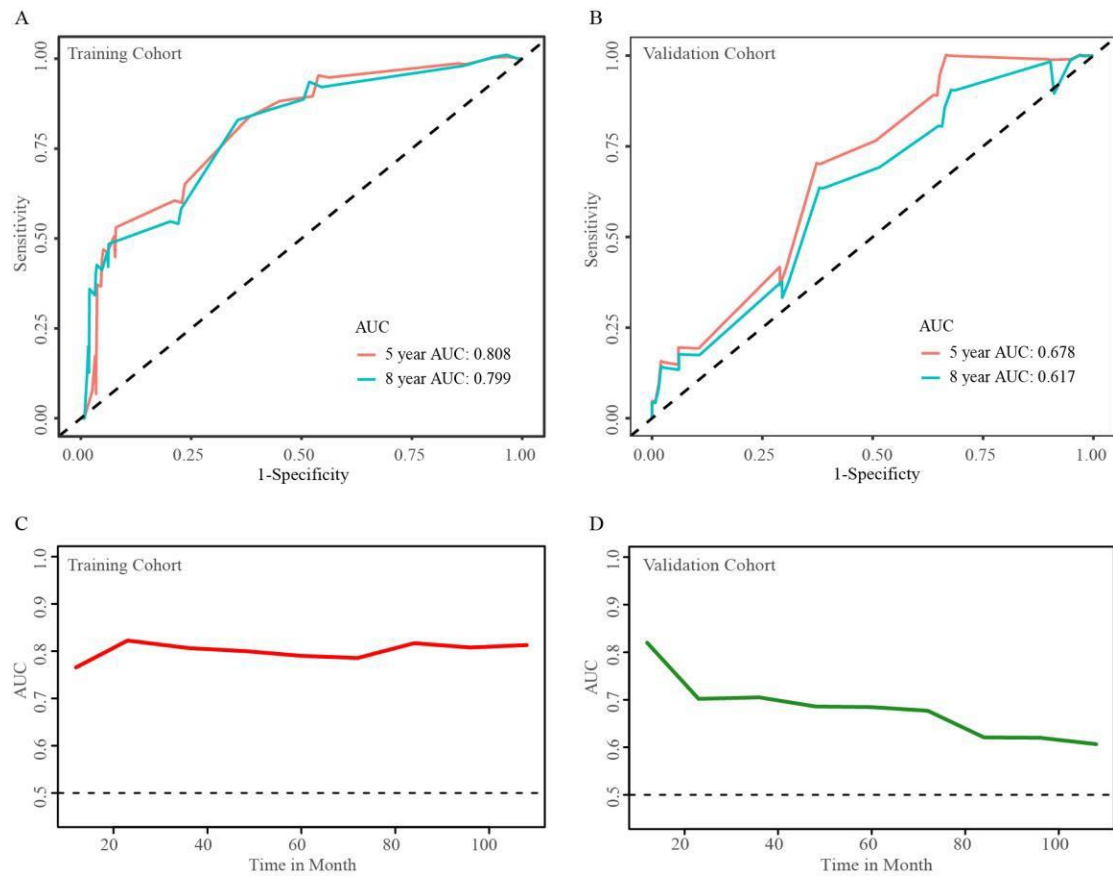

**Figure S3** Time-dependent ROC curve and areas under ROC curve at different time points. Areas under ROC curve of 5-year and 8-year overall survival rates in training cohort (**A**) and validation cohort (**B**); Areas under ROC curve at different time points in training cohort (**C**) and validation cohort (**D**);

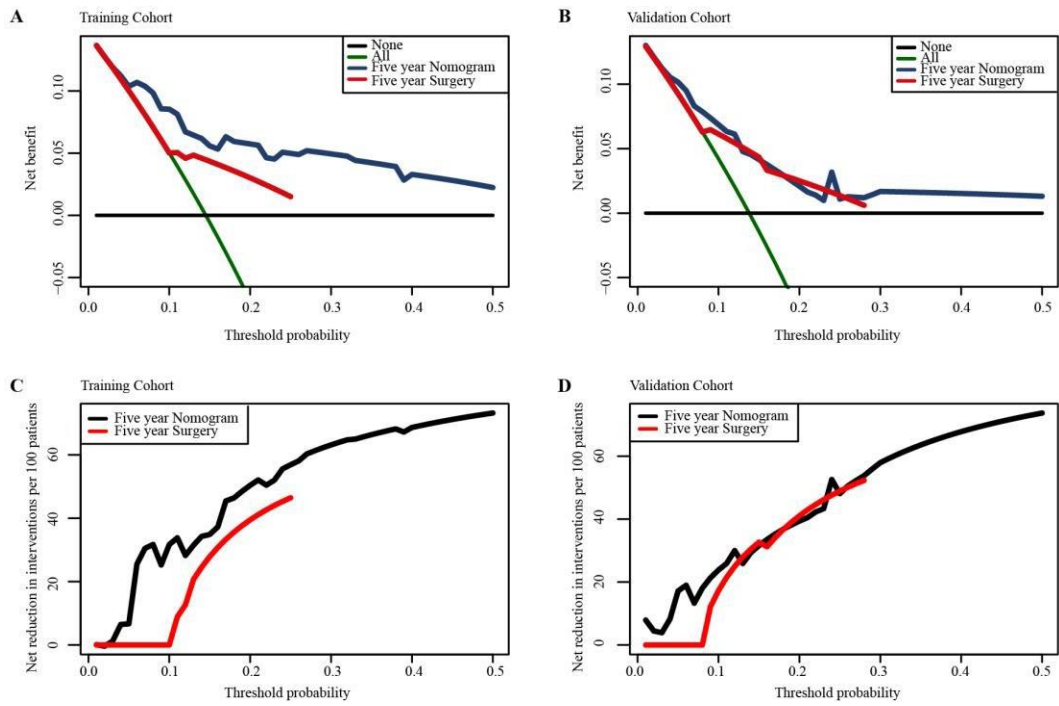

**Figure S4** Decision curve analysis for the nomogram and the model including surgery only in prediction of the overall survival rates of patients at 5 year point in training (A, C) and validation (B, D) cohort.

**Table S1** Univariate and multivariate cox proportional hazard regression analyses to determine

prognostic factors of overall survival for patients with low-grade brainstem glioma

|                  | 5-year OS rate (%) | 10-year OS rate (%) | Univariate analysis |                    | Multivariate analysis |                    |
|------------------|--------------------|---------------------|---------------------|--------------------|-----------------------|--------------------|
|                  |                    |                     | HR (95%CI)          | P-value            | HR (95%CI)            | P-value            |
| Age              |                    |                     |                     |                    |                       |                    |
| >21 Adult        | 79.1               | 74.9                | 1 [Reference]       |                    | 1 [Reference]         |                    |
| ≤21 Pediatric    | 91.3               | 89.8                | 0.36 (0.18-0.69)    | 0.002 <sup>†</sup> | 0.31 (0.13-0.73)      | 0.008 <sup>†</sup> |
| Sex              |                    |                     |                     |                    |                       |                    |
| Female           | 84.1               | 77.8                | 1 [Reference]       |                    | 1 [Reference]         |                    |
| Male             | 87.2               | 87.2                | 0.70 (0.37-1.29)    | 0.252              | 0.85 (0.43-1.70)      | 0.647              |
| Race             |                    |                     |                     |                    |                       |                    |
| White            | 86.7               | 83.2                | 1 [Reference]       |                    | 1 [Reference]         |                    |
| Black            | 83.5               | 83.5                | 1.18 (0.42-3.32)    | 0.760              | 1.04 (0.35-3.11)      | 0.941              |
| Asian/PI         | 73.3               | /                   | 1.60 (0.49-5.22)    | 0.437              | 2.69 (0.77-9.45)      | 0.121              |
| Marital status   |                    |                     |                     |                    |                       |                    |
| Unmarried        | 86.2               | 85.0                | 1 [Reference]       |                    | 1 [Reference]         |                    |
| Married          | 85.0               | 77.2                | 1.30 (0.67-2.51)    | 0.442              | 0.70 (0.31-1.56)      | 0.384              |
| WHO grade        |                    |                     |                     |                    |                       |                    |
| I                | 92.1               | 92.1                | 1 [Reference]       |                    | 1 [Reference]         |                    |
| II               | 80.8               | 76.4                | 2.96 (1.14-6.21)    | 0.004 <sup>†</sup> | 2.36 (0.42-13.30)     | 0.330              |
| Surgery          |                    |                     |                     |                    |                       |                    |
| Biopsy           | 78.2               | 78.2                | 1 [Reference]       |                    | 1 [Reference]         |                    |
| STR              | 76.1               | /                   | 1.10 (0.48-2.52)    | 0.814              | 1.46 (0.60-3.56)      | 0.410              |
| GTR              | 91.2               | 87.8                | 0.44 (0.21-0.92)    | 0.028 <sup>†</sup> | 0.58 (0.26-1.32)      | 0.193              |
| Size             |                    |                     |                     |                    |                       |                    |
| ≤3.6cm           | 84.0               | 80.3                | 1 [Reference]       |                    | 1 [Reference]         |                    |
| >3.6cm           | 87.8               | 86.1                | 0.74 (0.40-1.39)    | 0.353              | 1.18 (0.54-2.58)      | 0.683              |
| Metastasis       |                    |                     |                     |                    |                       |                    |
| No               | 86.3               | 83.4                | 1 [Reference]       |                    | 1 [Reference]         |                    |
| Yes              | 68.6               | /                   | 1.97 (0.47-8.15)    | 0.352              | 3.55 (0.77-16.29)     | 0.104              |
| Adjuvant therapy |                    |                     |                     |                    |                       |                    |
| None/Unknown     | 89.7               | 87.8                | 1 [Reference]       |                    | 1 [Reference]         |                    |
| Radiotherapy     | 77.6               | 75.3                | 2.05 (1.06-3.96)    | 0.032 <sup>†</sup> | 1.29 (0.60-2.79)      | 0.519              |
| Chemotherapy     | 94.4               | 78.7                | 0.86 (0.20-3.74)    | 0.839              | 0.78 (0.16-3.79)      | 0.758              |
| Both             | 86.2               | /                   | 1.32 (0.30-5.74)    | 0.714              | 0.87 (0.17-4.40)      | 0.866              |
| Extension        |                    |                     |                     |                    |                       |                    |
| Brainstem        | 80.3               | 76.5                | 1 [Reference]       |                    | 1 [Reference]         |                    |
| Cerebellum       | 88.0               | 88.0                | 0.63 (0.19-2.09)    | 0.447              | 0.59 (0.16-2.19)      | 0.432              |
| Ventricular      | 91.2               | 88.1                | 0.48 (0.22-1.03)    | 0.061              | 0.45 (0.19-1.06)      | 0.067              |
| Other            | 87.4               | 87.4                | 0.62 (0.25-1.52)    | 0.293              | 0.64 (0.23-1.79)      | 0.396              |
| Histology        |                    |                     |                     |                    |                       |                    |

|      |      |      |                  |                     |                  |                    |
|------|------|------|------------------|---------------------|------------------|--------------------|
| ET   | 85.6 | 81.9 | 1 [Reference]    |                     | 1 [Reference]    |                    |
| OAT  | 92.0 | 92.0 | 0.48 (0.22-1.05) | 0.067               | 1.29 (0.21-7.19) | 0.781              |
| DAOT | 59.1 | 51.7 | 3.60 (1.75-7.44) | <0.001 <sup>†</sup> | 3.66(1.47-9.12)  | 0.005 <sup>†</sup> |

**Notes:** <sup>†</sup>P<0.05, statistically significant.
